# Supplementary material for: Amphibious polymer-functionalized CdTe quantum dots: Synthesis, thermo-responsive self-assembly, and photoluminescent properties
Source: Royal Society of Chemistry journal article supplement (doi:10.1039/b905966k), 2009-01-01
Supplement: b905966k.pdf [file b905966k.pdf]

## Supporting Information

### Amphibious Polymer-Functionalized CdTe Quantum Dots: Synthesis, Thermo-responsive Self-assembly, and Photoluminescent Properties

Li Zhou<sup>a,b</sup>, Chao Gao<sup>a,\*</sup>, and Weijian Xu<sup>b,\*</sup>

<sup>a</sup> Key Laboratory of Macromolecular Synthesis and Functionalization (Ministry of Education), Department of Polymer Science and Engineering, Zhejiang University, 38 Zheda Road, Hangzhou 310027, P. R. China

<sup>b</sup> Institute of Polymer Science and Engineering, College of Chemistry and Chemical Engineering, Hunan University, Changsha 410082, P. R. China

[\*] Corresponding authors. E-mail: [chaogao@zju.edu.cn](mailto:chaogao@zju.edu.cn) (C. Gao), [weijxu@hnu.cn](mailto:weijxu@hnu.cn) (W. J. Xu)

#### Figure caption

**Fig. S1** (a) FTIR spectra of pristine QDs, QD@PDMAEMA and neat PDMAEMA. (b) <sup>1</sup>H NMR spectrum of QD@PDMAEMA3 in D<sub>2</sub>O.

**Fig. S2** Representative TEM images of QD@PDMAEMA by dropping a sample onto the Cu grid at room temperature (a), 30 °C (b), 40 °C under higher magnification (c) and lower magnification (d).

**Fig. S3** Dynamic light scattering (DLS) plots of QD@PDMAEMA4 at 28 (a), 32 (b), 34 (c), 36 (d), 38 (e), and 42 °C (f) during the heating process, and at 35 (g) and 32 °C (h) during the cooling process.

**Fig. S4** (a) TGA curves of pristine SiO<sub>2</sub> and SiO<sub>2</sub>-NH<sub>2</sub>, (b) FTIR spectra of pristine SiO<sub>2</sub>, SiO<sub>2</sub>-NH<sub>2</sub>, and SiO<sub>2</sub> spheres after one LbL assembly cycle of PAANa/QD@PDMAEMA (Designed as SiO<sub>2</sub>-QD@PDMAEMA).

Fig S1

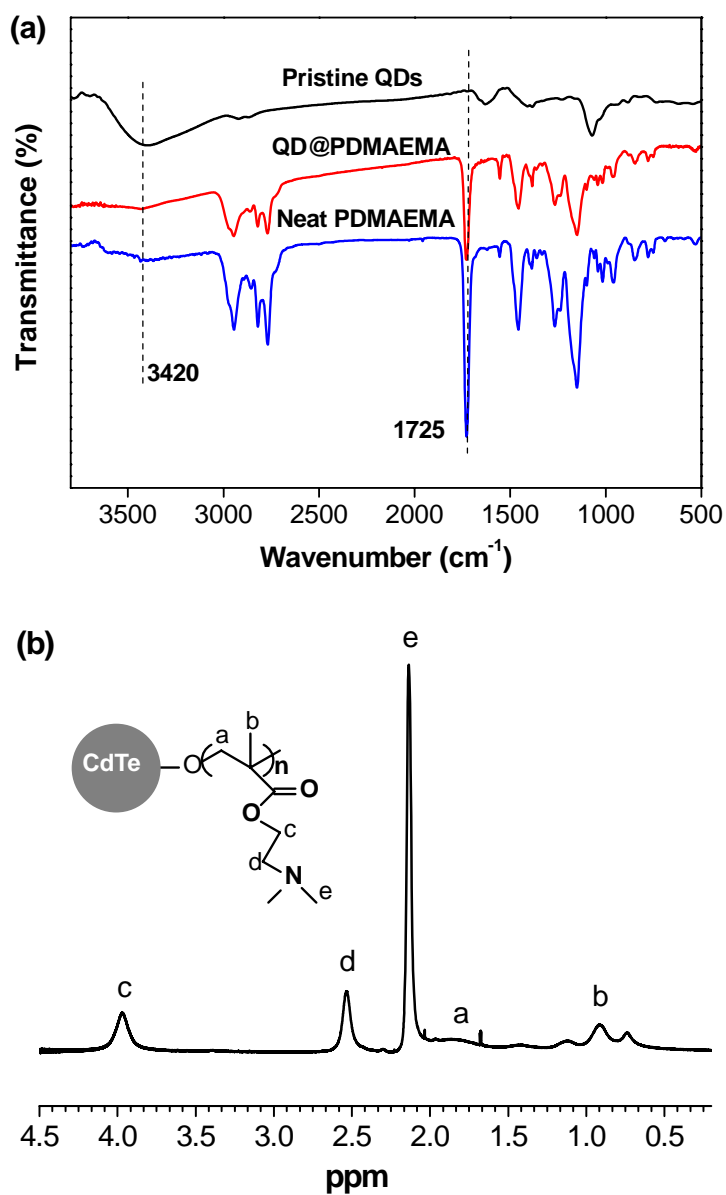

**Fig. S1** (a) FTIR spectra of pristine QDs, QD@PDMAEMA and neat PDMAEMA. (b)  $^1\text{H}$  NMR spectrum of QD@PDMAEMA3 in  $\text{D}_2\text{O}$ .

**Fig S2**

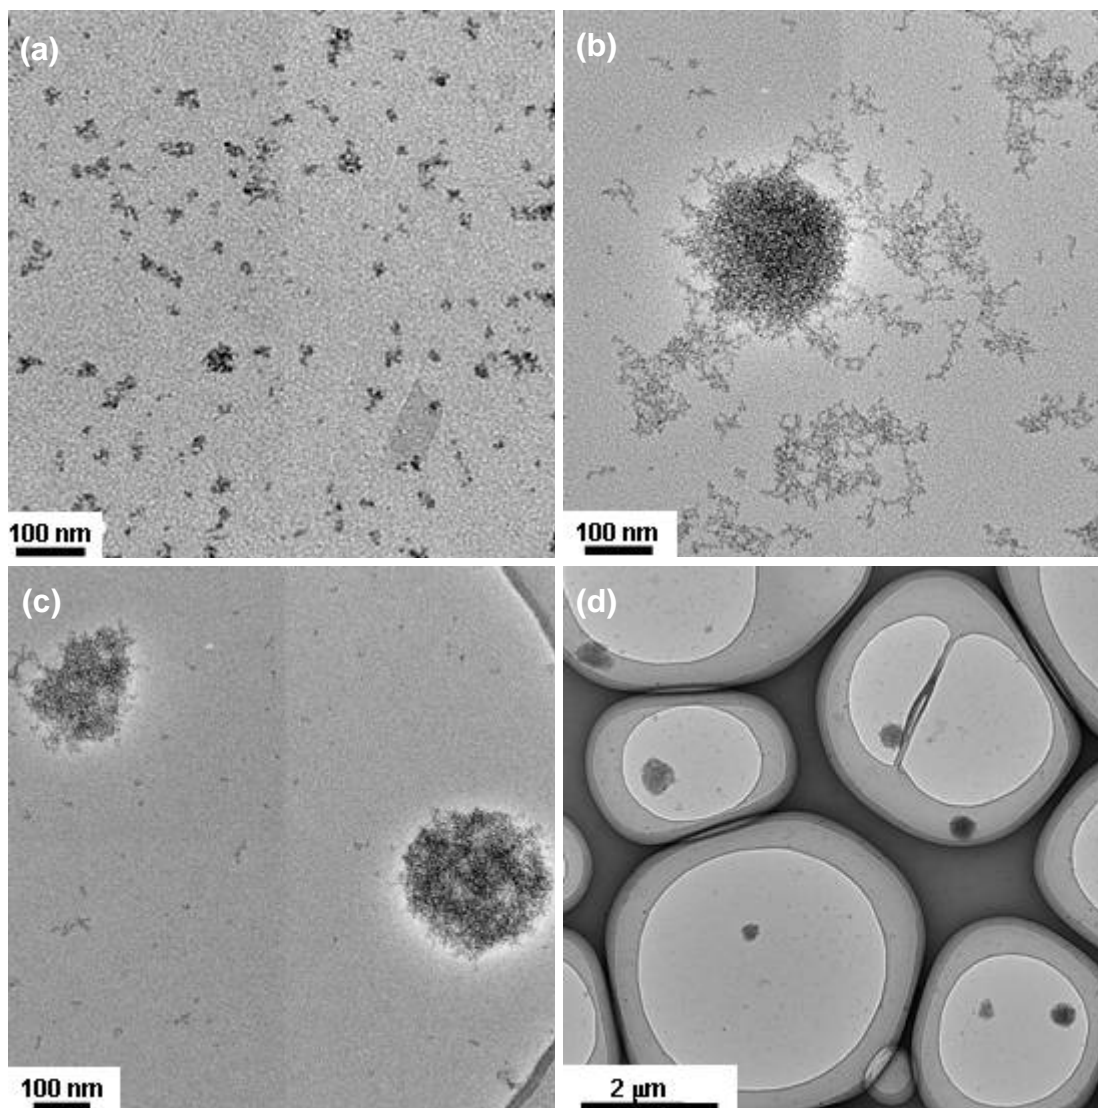

**Fig. S2** Representative TEM images of QD@PDMAEMA by dropping a sample onto the Cu grid at room temperature (a), 30 °C (b), 40 °C under higher magnification (c) and lower magnification (d).

Fig S3

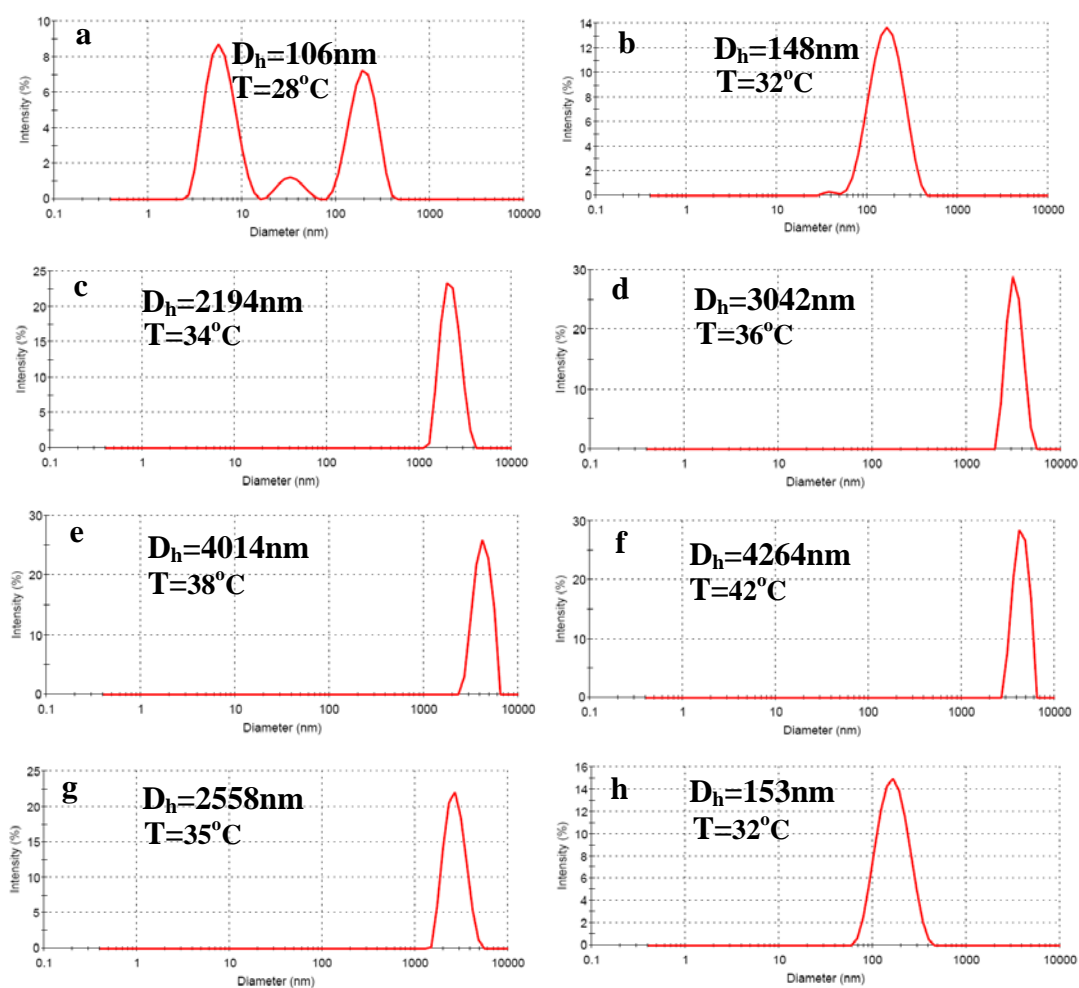

**Fig. S3** Dynamic light scattering (DLS) plots of QD@PDMAEMA4 at 28 (a), 32 (b), 34 (c), 36 (d), 38 (e), and 42 °C (f) during the heating process, and at 35 (g) and 32 °C (h) during the cooling process.

Fig S4

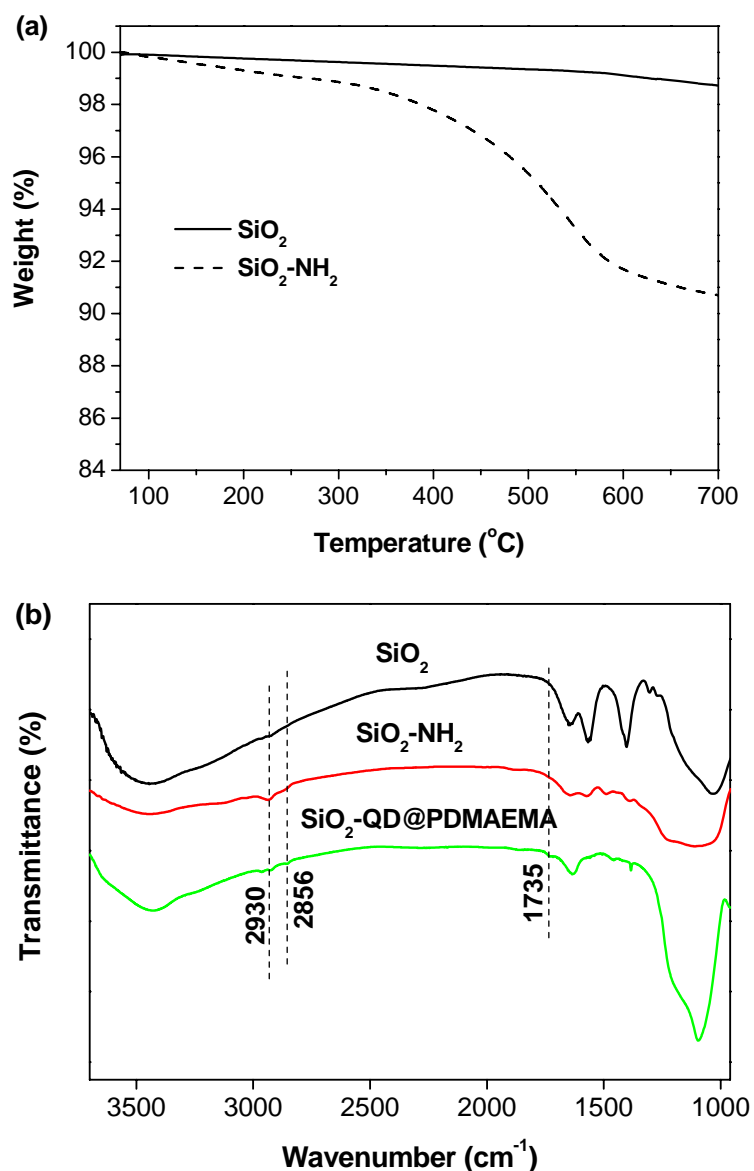

**Fig. S4** (a) TGA curves of pristine SiO<sub>2</sub> and SiO<sub>2</sub>-NH<sub>2</sub>, (b) FTIR spectra of pristine SiO<sub>2</sub>, SiO<sub>2</sub>-NH<sub>2</sub>, and SiO<sub>2</sub> spheres after one LbL assembly cycle of PAANa/QD@PDMAEMA (Designed as SiO<sub>2</sub>-QD@PDMAEMA).
